# Supplementary material for: Red pepper seed water extract inhibits preadipocyte differentiation and induces mature adipocyte apoptosis in 3T3-L1 cells
Source: PubMed Central journal article supplement — Nutr Res Pract. 2018 Nov 23;12(6):494–502. doi: 10.4162/nrp.2018.12.6.494 (PMC6277307; doi:10.4162/nrp.2018.12.6.494), 2018-11-23
Supplement: nrp-12-494-s001.pdf [file nrp-12-494-s001.pdf]

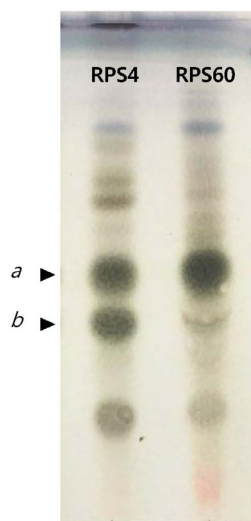

**Supplement Fig. 1.** TLC profile of red pepper seed water extract. Chloroform- methanol-water (5:5:1) was used as an eluent, The chromatogram was sprayed with anisaldehyde-sulfuric acid; Retardation factor (Rf) values for spots a and b are 0,456 and 0,362, respectively.
