# Supplementary material for: Red pepper seed water extract inhibits preadipocyte differentiation and induces mature adipocyte apoptosis in 3T3-L1 cells
Source: PubMed Central journal article supplement — Nutr Res Pract. 2018 Nov 23;12(6):494–502. doi: 10.4162/nrp.2018.12.6.494 (PMC6277307; doi:10.4162/nrp.2018.12.6.494), 2018-11-23
Supplement: nrp-12-494-s002.pdf [file nrp-12-494-s002.pdf]

**Supplement Table 1.** Yield of fractions of red pepper seed water extract.

| Fractions     | Percentage Yield (%) |       |
|---------------|----------------------|-------|
|               | RPS4                 | RPS60 |
| Hexane        | 19.6                 | 8.4   |
| Chloroform    | 21.6                 | 0.4   |
| Ethyl acetate | 2                    | 0.7   |
| Butanol       | 16.4                 | 12.2  |
| Water         | 37.7                 | 70.7  |
