# Supplementary material for: Red pepper seed water extract inhibits preadipocyte differentiation and induces mature adipocyte apoptosis in 3T3-L1 cells
Source: PubMed Central journal article supplement — Nutr Res Pract. 2018 Nov 23;12(6):494–502. doi: 10.4162/nrp.2018.12.6.494 (PMC6277307; doi:10.4162/nrp.2018.12.6.494), 2018-11-23
Supplement: nrp-12-494-s003.pdf [file nrp-12-494-s003.pdf]

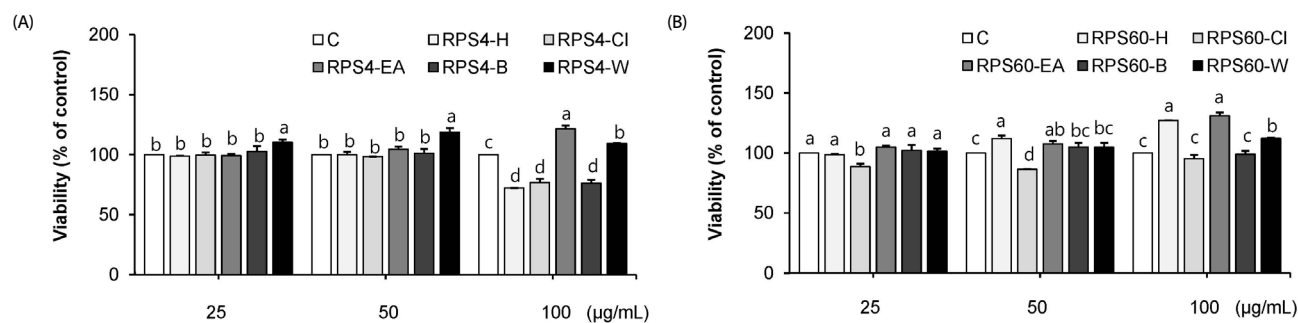

**Supplement Fig. 2.** Effect of red pepper seed water extracts and fractions on the viability in preadipocytes. Cells were treated with various concentrations of (A) RPS4 or (B) RPS60 fractionates for 24 h, C, PBS or DMSO; RPS4-H, n-hexane fractionate of red pepper seed water extract (4°C) ; RPS4-Cl, chloroform fractionate of red pepper seed water extract (4°C); RPS4-EA, ethylacetate fractionate of red pepper seed water extract (4°C); RPS4-B, butanol fractionate of red pepper seed water extract (4°C); RPS4-W, water fractionate of red pepper seed water extract (4°C). Values are Mean±SE. Stand error bars represent three independent experiments and each experiment was triplicated, Means with the same letter are not significantly different by Duncan's multiple range test ( $P < 0,05$ ).
